# Supplementary material
Source: HighWire-hosted journal article supplement (https://bmjopen.bmj.com/content/8/2/e020991)
Supplement: inline-supplementary-material-1 [file inline-supplementary-material-1.pdf]

## Appendix 1 Search strategies

### 1. Medline (Ovid) (Search date: August 17, 2017)

- 1 exp abscess/
- 2 abscess\* mp.
- 3 boil mp.
- 4 furunc\* mp.
- 5 carbunc\*mp.
- 6 1 or 2 or 3 or 4 or 5
- 7 exp skin diseases, infectious/
- 8 skin mp.
- 9 cutaneous mp.
- 10 superficial mp.
- 11 face mp.
- 12 facial mp.
- 13 7 or 8 or 9 or 10 or 11 or 12
- 14 6 and 13
- 15 exp anti-infective agents/
- 16 antibiotic\* mp.
- 17 antimicrobial\* mp.
- 18 antibacterial\*.mp.
- 19 trimethoprim-sulfamethoxazole.mp.
- 20 clindamycin.mp.
- 21 cephalexin.mp.
- 22 cefazolin.mp.
- 23 doxycycline.mp.
- 24 minocycline.mp.
- 25 daptomycin.mp.
- 26 vancomycin.mp.
- 27 linezolid.mp.
- 28 nafcillin.mp.
- 29 dicloxacillin.mp.
- 30 televancin.mp.
- 31 15 or 16 or 17 or 18 or 19 or 20 or 21 or 22 or 23 or 24 or 25 or 26 or 27 or 28 or 29 or 30
- 32 clinical trial.mp.
- 33 clinical trial.pt.
- 34 random:.mp.
- 35 tu.xs.
- 36 33 or 34 or 35 or 36
- 37 14 and 32 and 37
- 38 limit 37 to humans

### 2. Embase (Ovid) (Search date: August 17, 2017)

- 1 exp skin abscess/

- 2 ((abscess\* or boil or furunc\* or carbunc\*) adj6 (skin or cutaneous or superficial or face or facial)).mp.
- 3 1 or 2
- 4 exp antiinfective agent/
- 5 antibiotic\*.mp.
- 6 antimicrobial\*.mp.
- 7 antibacterial\*.mp.
- 8 trimethoprim-sulfamethoxazole.mp.
- 9 clindamycin.mp.
- 10 cephalixin.mp.
- 11 cefazolin.mp.
- 12 doxycycline.mp.
- 13 minocycline.mp.
- 14 daptomycin.mp.
- 15 vancomycin.mp.
- 16 linezolid.mp.
- 17 nafcillin.mp.
- 18 dicloxacillin.mp.
- 19 televancin.mp.
- 20 4 or 5 or 6 or 7 or 8 or 9 or 10 or 11 or 12 or 13 or 14 or 15 or 16 or 17 or 18 or 19
- 21 random:.mp.
- 22 clinical trial:.mp.
- 23 exp health care quality/
- 24 21 or 22 or 23
- 25 3 and 20 and 24

**3. Cochrane Central Register of Controlled Trials (Ovid) (Search date: August 7, 2017)**

- 1 exp abscess/
- 2 abscess\*.mp.
- 3 boil.mp.
- 4 furunc\*.mp.
- 5 carbunc\*.mp.
- 6 1 or 2 or 3 or 4 or 5
- 7 exp skin diseases, infectious/
- 8 skin.mp.
- 9 cutaneous.mp
- 10 superficial.mp.
- 11 face.mp.
- 12 facial).mp.
- 13 7 or 8 or 9 or 10 or 11 or 12
- 14 6 and 13
- 15 exp Anti-Infective Agents/
- 16 antibiotic\*.mp.
- 17 antimicrobial\*.mp.

- 18 antibacterial\*.mp.
- 19 trimethoprim-sulfamethoxazole.mp.
- 20 clindamycin.mp.
- 21 cephalexin.mp.
- 22 cefazolin.mp.
- 23 doxycycline.mp.
- 24 minocycline.mp.
- 25 daptomycin.mp.
- 26 vancomycin.mp.
- 27 linezolid.mp.
- 28 nafcillin.mp.
- 29 dicloxacillin.mp.
- 30 televancin.mp.
- 31 15 or 16 or 17 or 18 or 19 or 20 or 21 or 22 or 23 or 24 or 25 or 26 or 27 or 28 or 29 or 30

**4. ClinicalTrials.gov (Search date: October 31, 2017)**

skin infection OR abscess OR abscesses | Studies With Results
